# Supplementary material for: Theoretical investigation of borane compounds mimicking transition metals for N2fixation and activation
Source: Royal Society of Chemistry journal article supplement (doi:10.1039/d2cp04560e), 2022-12-07
Supplement: d2cp04560e1.pdf [file d2cp04560e1.pdf]

Supporting Information for

# Theoretical Investigation on Borane Compounds Mimicking Transition Metals for N<sub>2</sub> Fixation and Activation

Zhipeng Li, Guoliang Song\*, Zhen Hua Li\*

Shanghai Key Laboratory of Molecular Catalysis and Innovative Material, Department of Chemistry

Fudan University

Shanghai, 200438, China

Fax: (+86) 21-55661740

E-mail: guoliangsong@fudan.edu.cn;

lizhenhua@fudan.edu.cn

## Table of Contents

|                                                                     |    |
|---------------------------------------------------------------------|----|
| 1. Validations for Computational Methods .....                      | 2  |
| 2. Structures of designed silylborane compounds .....               | 4  |
| 3. Cartesian coordinates of recommended silylborane compounds ..... | 11 |

# 1. Validations for Computational Methods

**Table S1.** Relative Gibbs free energies ( $\Delta G$ ) at 298.15 K, and relative potential energies ( $\Delta E$ ) of  $N_2$  with simple silylborane compounds. (Unit: kcal/mol)

| $\Delta G$                          | H <sub>2</sub> BSiH <sub>3</sub> | H <sub>3</sub> C(H)BSiH <sub>3</sub> | (H <sub>3</sub> C) <sub>2</sub> BSiH <sub>3</sub> | HB(SiH <sub>3</sub> ) <sub>2</sub> | H <sub>3</sub> CB(SiH <sub>3</sub> ) <sub>2</sub> | B(SiH <sub>3</sub> ) <sub>3</sub> |
|-------------------------------------|----------------------------------|--------------------------------------|---------------------------------------------------|------------------------------------|---------------------------------------------------|-----------------------------------|
| $N_2 \cdots BR_3$                   | -                                | 6.3                                  | -                                                 | 5.2                                | 6.7                                               | 3.9                               |
| $[N_2 \cdots BR_3]^\ddagger$        | -                                | 11.5                                 | 15.3                                              | 5.2                                | 12.2                                              | 6.2                               |
| $N_2 : BR_3$                        | 2.1                              | 10.5                                 | 15.6                                              | -1.4                               | 7.9                                               | -4.8                              |
| $R_3B \cdots N_2 : BR_3$            | 11.0                             | -                                    | -                                                 | 7.9                                | 19.1                                              | 3.6                               |
| $[R_3B \cdots N_2 : BR_3]^\ddagger$ | 10.9                             | 24.2                                 | 33.6                                              | 8.5                                | 22.2                                              | 6.2                               |
| $R_3B : N_2 : BR_3$                 | 5.9                              | 22.9                                 | 33.4                                              | -2.4                               | 13.7                                              | -10.8                             |
| $\Delta E$                          | H <sub>2</sub> BSiH <sub>3</sub> | H <sub>3</sub> C(H)BSiH <sub>3</sub> | (H <sub>3</sub> C) <sub>2</sub> BSiH <sub>3</sub> | HB(SiH <sub>3</sub> ) <sub>2</sub> | H <sub>3</sub> CB(SiH <sub>3</sub> ) <sub>2</sub> | B(SiH <sub>3</sub> ) <sub>3</sub> |
| $N_2 \cdots BR_3$                   | -                                | -2.1                                 | -                                                 | -3.3                               | -2.3                                              | -3.2                              |
| $[N_2 \cdots BR_3]^\ddagger$        | -                                | -0.1                                 | 3.5                                               | -3.3                               | -0.1                                              | -3.0                              |
| $N_2 : BR_3$                        | -10.9                            | -3.4                                 | 2.5                                               | -14.4                              | -7.0                                              | -18.1                             |
| $R_3B \cdots N_2 : BR_3$            | -13.8                            | -                                    | -                                                 | -18.7                              | -11.4                                             | -22.4                             |
| $[R_3B \cdots N_2 : BR_3]^\ddagger$ | -13.0                            | -2.0                                 | 7.4                                               | -17.2                              | -7.3                                              | -21.4                             |
| $R_3B : N_2 : BR_3$                 | -20.6                            | -6.2                                 | 5.7                                               | -29.8                              | -15.9                                             | -38.4                             |

**Table S2** Relative potential energies of G4 and 11 DFT methods for the reaction between N<sub>2</sub> and H<sub>3</sub>CB(SiH<sub>3</sub>)<sub>2</sub>. (Unit: kcal/mol)<sup>a</sup>

|                | $N_2 \cdots BR_3$ | $[N_2 \cdots BR_3]^\ddagger$ | $N_2:BR_3$ | $R_3B \cdots N_2:BR_3$ | $[R_3B \cdots N_2:BR_3]^\ddagger$ | $R_3B:N_2:BR_3$ |
|----------------|-------------------|------------------------------|------------|------------------------|-----------------------------------|-----------------|
| G4             | -2.5              | -1.4                         | -6.7       | -10.6                  | -9.0                              | -16.8           |
| BLYP           | 1.6               | 3.5                          | -5.6       | 0.7                    | -1.5                              | -14.0           |
| PBE            | -0.2              | -0.9                         | -14.1      | -12.5                  | -16.3                             | -32.1           |
| B3LYP          | 0.8               | 3.1                          | -4.3       | 0.5                    | 0.1                               | -10.6           |
| $\omega$ B97XD | -1.5              | 0.5                          | -5.5       | -8.7                   | -5.5                              | -13.5           |
| M06-L          | -2.6              | -1.9                         | -11.9      | -16.5                  | -15.5                             | -26.6           |
| MN15-L         | -3.2              | -1.0                         | -9.6       | -18.6                  | -14.1                             | -22.4           |
| M06            | -2.3              | -0.6                         | -7.7       | -12.4                  | -10.0                             | -18.7           |
| M06-2X         | -2.3              | -0.1                         | -7.0       | -11.4                  | -7.3                              | -15.9           |
| MN15           | -2.7              | -2.2                         | -10.4      | -17.4                  | -14.5                             | -24.4           |
| PBE0DH         | -0.9              | -0.6                         | -9.2       | -8.9                   | -9.4                              | -20.9           |
| DSDPBEP86      | -2.7              | -2.3                         | -8.8       | -13.2                  | -12.7                             | -22.0           |

<sup>a</sup> Single-point energy calculations were performed on geometries optimized with the M06-2X/AVTZ method.

## 2. Structures of designed silylborane compounds

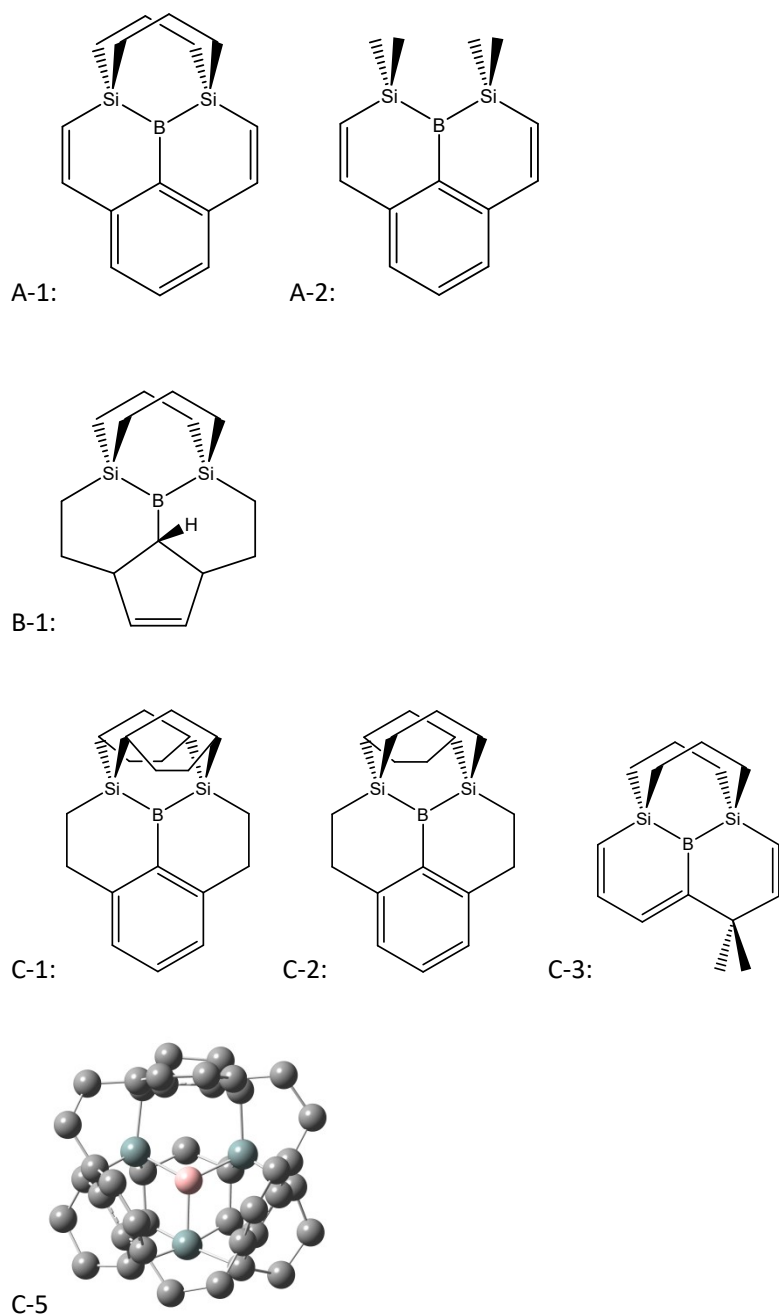

**Figure S1.** Selected structures of designed silylborane compounds with single B center optimized by the M06-2X/SBS method in gas phase. H atoms were omitted for clarity.

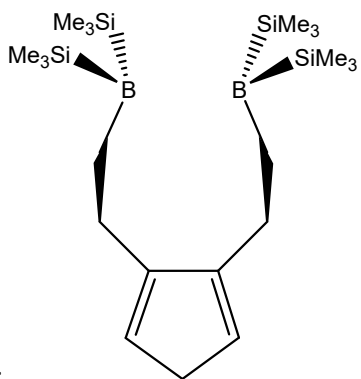

Ring5-1:

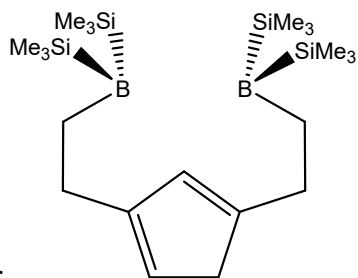

Ring5-2:

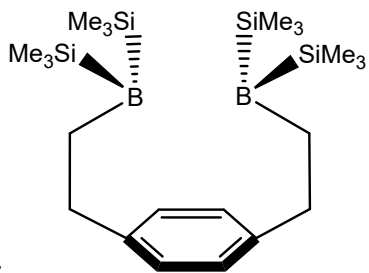

Ring6-3:

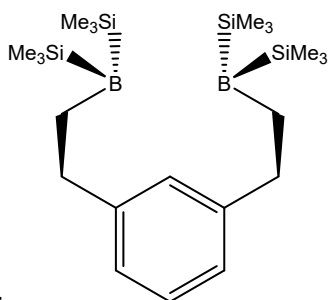

Ring6-2-Ph:

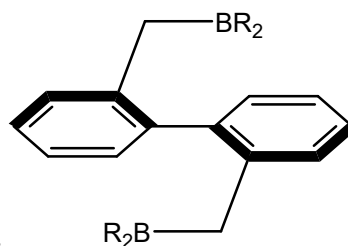

Biphenyl(R=SiH<sub>3</sub>/SiMe<sub>3</sub>):

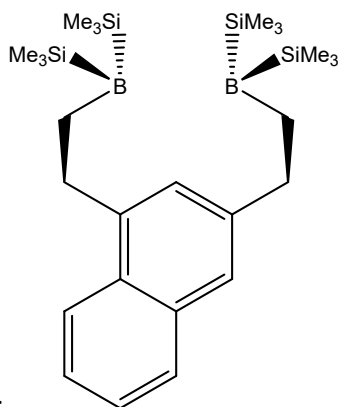

Naphthalene-1:

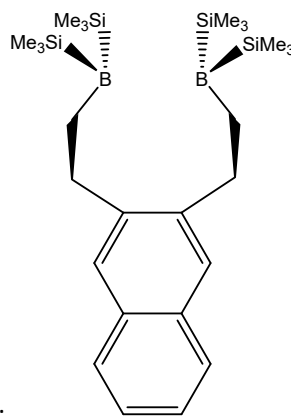

Naphthalene-2:

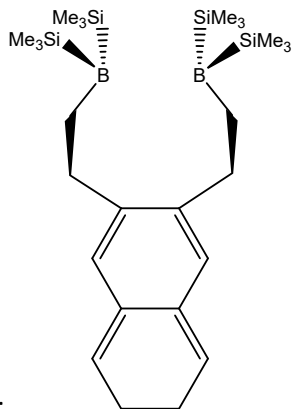

Naphthalene-3:

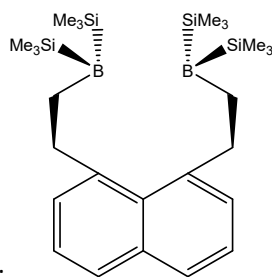

Naphthalene-4:

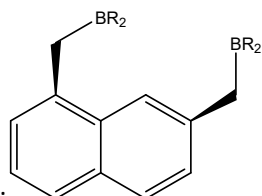

Naphthalene-5(R=SiH<sub>3</sub>/SiMe<sub>3</sub>):

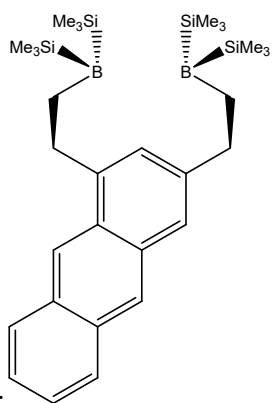

Anthracene-1:

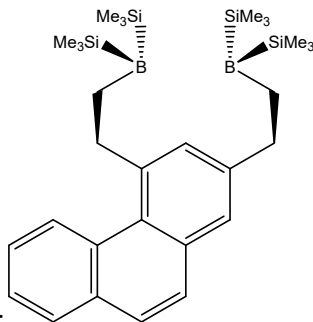

Phenanthrene-1:

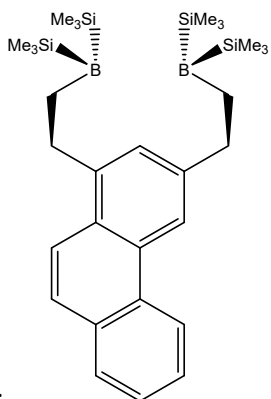

Phenanthrene-2:

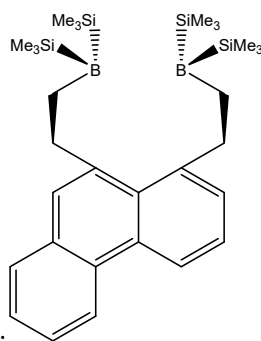

Phenanthrene-3:

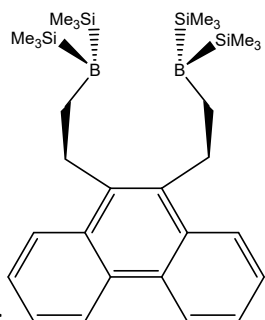

Phenanthrene-4:

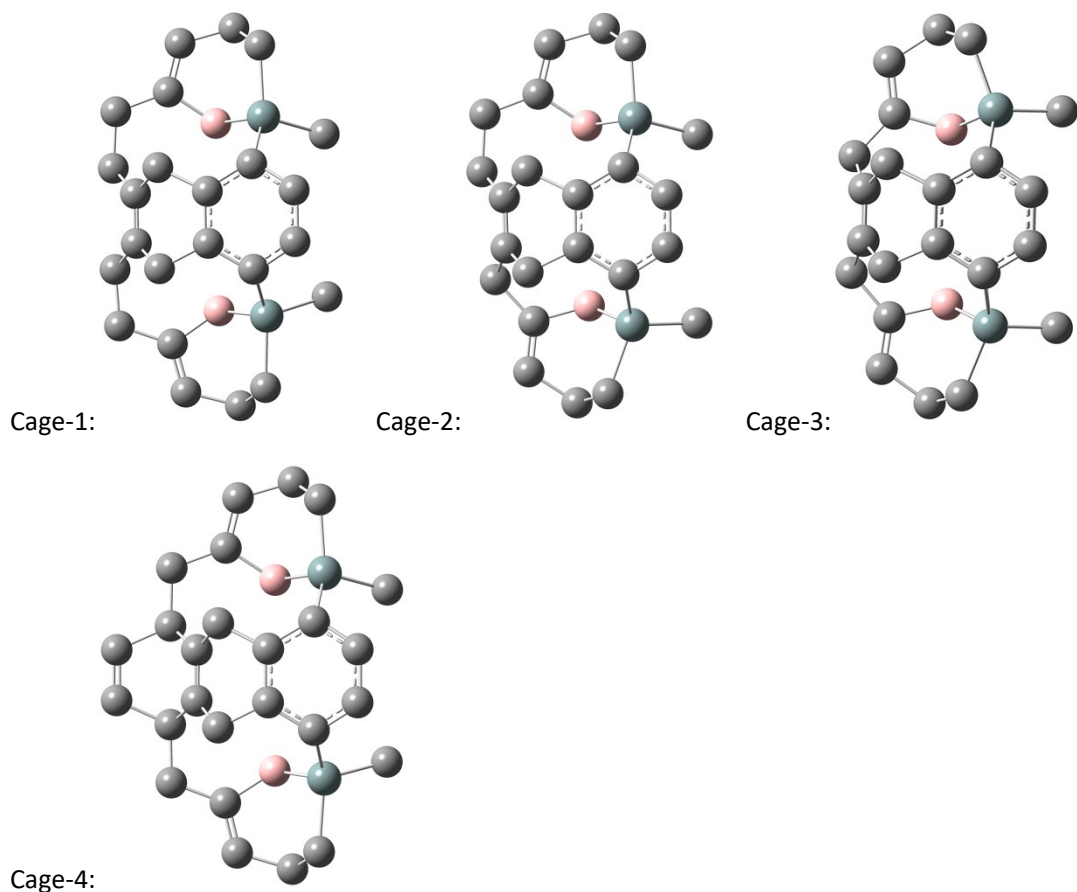

**Figure S2.** Selected structures of designed silylborane compounds with double B centers optimized by the M06-2X/SBS method in gas phase. H atoms were omitted for clarity.

**Table S3.** Relative Gibbs free energies ( $\Delta G$ ) at 298.15 K, and relative potential energies ( $\Delta E$ ) of  $N_2$  with eight recommended silylborane compounds. (Unit: kcal/mol)

| $\Delta G$                                             | $N_2 \cdots BR_3$ | $[N_2 \cdots BR_3]^\ddagger$ | $N_2:BR_3$ | $R_3B \cdots N_2:BR_3$ | $[R_3B \cdots N_2:BR_3]^\ddagger$ | $R_3B:N_2:BR_3$ |
|--------------------------------------------------------|-------------------|------------------------------|------------|------------------------|-----------------------------------|-----------------|
| <b>B-1</b>                                             | -                 | 13.6                         | 3.0        | 6.9                    | 11.8                              | 0.8             |
| <b>B-2</b>                                             | -                 | 13.4                         | 3.2        | 7.3                    | 12.3                              | 0.4             |
| <b>C-4</b>                                             | -                 | 13.9                         | 2.4        | 7.3                    | 11.4                              | -6.7            |
| <b>C-5</b>                                             | -                 | 22.8                         | -5.0       | -                      | -                                 | -               |
| B(SiPhMe <sub>2</sub> ) <sub>3</sub>                   | -                 | 6.6                          | -6.3       | 1.3                    | 7.7                               | -3.1            |
| B(SiPhMe <sub>2</sub> ) <sub>2</sub> SiMe <sub>3</sub> | 3.5               | 4.5                          | -8.4       | -0.8                   | 1.2                               | -13.3           |
| <b>Ring6-1</b>                                         | -                 | 14.4                         | 6.6        | -                      | 10.2                              | -0.1            |
| <b>Ring6-2</b>                                         | -                 | 9.5                          | 3.8        | -                      | 8.6                               | 0.7             |
| $\Delta E$                                             | $N_2 \cdots BR_3$ | $[N_2 \cdots BR_3]^\ddagger$ | $N_2:BR_3$ | $R_3B \cdots N_2:BR_3$ | $[R_3B \cdots N_2:BR_3]^\ddagger$ | $R_3B:N_2:BR_3$ |
| <b>B-1</b>                                             | -                 | 2.4                          | -11.6      | -22.4                  | -19.1                             | -32.5           |
| <b>B-2</b>                                             | -                 | 2.4                          | -10.8      | -20.4                  | -17.3                             | -30.6           |
| <b>C-4</b>                                             | -                 | 2.6                          | -11.6      | -21.1                  | -19.3                             | -37.5           |
| <b>C-5</b>                                             | -                 | 11.6                         | -20.3      | -                      | -                                 | -               |
| B(SiPhMe <sub>2</sub> ) <sub>3</sub>                   | -                 | 0.2                          | -17.6      | -23.0                  | -20.0                             | -35.2           |
| B(SiPhMe <sub>2</sub> ) <sub>2</sub> SiMe <sub>3</sub> | -5.3              | -5.4                         | -23.2      | -34.4                  | -34.3                             | -50.8           |
| <b>Ring6-1</b>                                         | -                 | 3.2                          | -5.1       | -                      | -3.3                              | -16.5           |
| <b>Ring6-2</b>                                         | -                 | 1.5                          | -7.4       | -                      | -5.5                              | -14.8           |



**Table S4.** Binding Gibbs free energies ( $\Delta G_{\text{bin}}$ ) at 298.15 K and binding potential energies ( $\Delta E_{\text{bin}}$ ) of  $\text{N}_2$  with single-boron-center silylborane compounds. (unit: kcal/mol)

| BR <sub>3</sub>                                                  | N <sub>2</sub> :BR <sub>3</sub> |                         | R <sub>3</sub> B:N <sub>2</sub> :BR <sub>3</sub> |                         |
|------------------------------------------------------------------|---------------------------------|-------------------------|--------------------------------------------------|-------------------------|
|                                                                  | $\Delta G_{\text{bin}}$         | $\Delta E_{\text{bin}}$ | $\Delta G_{\text{bin}}$                          | $\Delta E_{\text{bin}}$ |
| (SiMe <sub>3</sub> ) <sub>2</sub> BMe                            | 4.5                             | -10.0                   | 4.8                                              | -27.4                   |
| (SiEt <sub>3</sub> ) <sub>2</sub> BMe                            | 4.7                             | -9.7                    | 4.5                                              | -27.7                   |
| (Si(iPr) <sub>3</sub> ) <sub>2</sub> BMe                         | 15.2                            | -0.3                    | -                                                | -                       |
| (SiPh <sub>3</sub> ) <sub>2</sub> BMe                            | 8.9                             | -6.1                    | 1.7                                              | -37.6                   |
| (SiPhMe <sub>2</sub> ) <sub>2</sub> BMe                          | 3.7                             | -10.9                   | 7.1                                              | -27.3                   |
| (SiPh <sub>3</sub> ) <sub>2</sub> BCF <sub>3</sub>               | -0.6                            | -15.0                   | -4.1                                             | -42.6                   |
| (SiPh <sub>3</sub> ) <sub>2</sub> BCCl <sub>3</sub>              | 7.9                             | -6.1                    | 33.1                                             | -7.1                    |
| (SiPh <sub>3</sub> ) <sub>2</sub> BC(CN) <sub>3</sub>            | 3.9                             | -9.5                    | 22.7                                             | -16.3                   |
| (SiPh <sub>3</sub> ) <sub>2</sub> BC <sub>6</sub> F <sub>5</sub> | 4.9                             | -10.7                   | 14.8                                             | -27.0                   |
| (SiMe <sub>3</sub> ) <sub>3</sub> B                              | -8.1                            | -23.4                   | -22.0                                            | -55.4                   |
| (SiEt <sub>3</sub> ) <sub>3</sub> B                              | -5.4                            | -20.1                   | -11.1                                            | -48.9                   |
| (SiPh <sub>3</sub> ) <sub>3</sub> B                              | 7.3                             | -6.4                    | 54.1                                             | 12.6                    |
| (SiPhH <sub>2</sub> ) <sub>3</sub> B                             | -6.6                            | -20.3                   | -20.1                                            | -56.8                   |
| (SiPhMe <sub>2</sub> ) <sub>3</sub> B                            | -6.3                            | -17.6                   | -3.1                                             | -35.2                   |
| (SiPhMe <sub>2</sub> ) <sub>2</sub> BSiMe <sub>3</sub>           | -8.4                            | -23.2                   | -13.3                                            | -50.8                   |
| A-1                                                              | 1.9                             | -11.4                   | -7.5                                             | -35.5                   |
| A-2                                                              | -                               | -                       | 6.5                                              | -23.5                   |
| B-3                                                              | 4.5                             | -9.3                    | 1.9                                              | -28.5                   |
| C-1                                                              | 7.0                             | -2.4                    | 18.9                                             | -12.9                   |
| C-2                                                              | 1.4                             | -12.2                   | -4.1                                             | -33.2                   |
| C-3                                                              | 1.6                             | -12.1                   | -8.9                                             | -39.3                   |
| C-5                                                              | -5.0                            | -20.3                   | -                                                | -                       |

**Table S5.** Binding Gibbs free energies ( $\Delta G_{\text{bin}}$ ) at 298.15 K and binding potential energies ( $\Delta E_{\text{bin}}$ ) of  $\text{N}_2$  with double-boron-center silyborane compounds. (unit: kcal/mol)

| $(\text{R}_3\text{B})_2$                                                                                 | $\text{R}_3\text{B}:\text{N}_2:\text{BR}_3$ |                         |
|----------------------------------------------------------------------------------------------------------|---------------------------------------------|-------------------------|
|                                                                                                          | $\Delta G_{\text{bin}}$                     | $\Delta E_{\text{bin}}$ |
| $(\text{Me}_3\text{Si})_2\text{B}(\text{CH}_2)_3\text{B}(\text{SiMe}_3)_2$                               | 15.6                                        | -2.7                    |
| $(\text{Me}_3\text{Si})_2\text{B}(\text{CH}_2)_4\text{B}(\text{SiMe}_3)_2$                               | 10.0                                        | -9.9                    |
| $(\text{Me}_3\text{Si})_2\text{B}(\text{CH}_2)\text{CH}=\text{CH}(\text{CH}_2)\text{B}(\text{SiMe}_3)_2$ | 12.2                                        | -3.6                    |
| $(\text{Me}_3\text{Si})_2\text{B}(\text{CH}_2)_5\text{B}(\text{SiMe}_3)_2$                               | 6.6                                         | -14.9                   |
| $(\text{H}_3\text{Si})_2\text{B}(\text{CH}_2)_6\text{B}(\text{SiH}_3)_2$                                 | 11.0                                        | -7.2                    |
| $(\text{Me}_3\text{Si})_2\text{B}(\text{CH}_2)_6\text{B}(\text{SiMe}_3)_2$                               | 4.8                                         | -18.4                   |
| $(\text{Me}_3\text{Si})_2\text{B}(\text{CH}_2)_7\text{B}(\text{SiMe}_3)_2$                               | 4.9                                         | -20.1                   |
| Ring5-1                                                                                                  | 5.0                                         | -11.7                   |
| Ring5-2                                                                                                  | 8.6                                         | -9.1                    |
| Ring6-3                                                                                                  | 7.0                                         | -11.0                   |
| Ring6-2-Ph                                                                                               | 22.8                                        | 1.4                     |
| Biphenyl( $\text{R}=\text{SiH}_3$ )                                                                      | 10.5                                        | -3.4                    |
| Biphenyl( $\text{R}=\text{SiMe}_3$ )                                                                     | 5.8                                         | -12.9                   |
| Naphthalene-1                                                                                            | 3.0                                         | -14.5                   |
| Naphthalene-2                                                                                            | 3.1                                         | -14.9                   |
| Naphthalene-3                                                                                            | 2.8                                         | -14.2                   |
| Naphthalene-4                                                                                            | 7.4                                         | -8.1                    |
| Naphthalene-5( $\text{R}=\text{SiH}_3$ )                                                                 | 13.5                                        | -8.1                    |
| Naphthalene-5( $\text{R}=\text{SiMe}_3$ )                                                                | 8.9                                         | -7.8                    |
| Anthracene-1                                                                                             | 3.2                                         | -13.0                   |
| Phenanthrene-1                                                                                           | 3.2                                         | -15.7                   |
| Phenanthrene-2                                                                                           | 2.7                                         | -13.6                   |
| Phenanthrene-3                                                                                           | 6.9                                         | -9.3                    |
| Phenanthrene-4                                                                                           | 2.9                                         | -12.7                   |
| Cage-1                                                                                                   | -3.5                                        | -21.1                   |
| Cage-2                                                                                                   | -17.2                                       | -34.4                   |
| Cage-3                                                                                                   | -25.6                                       | -43.1                   |
| Cage-4                                                                                                   | 1.7                                         | -15.7                   |

### 3. Cartesian coordinates of recommended silylborane compounds

#### B-1:

|    |             |             |             |
|----|-------------|-------------|-------------|
| B  | 0.16383200  | 0.00000300  | -0.37297900 |
| C  | 1.61834300  | -0.00002800 | -0.87227800 |
| Si | -0.92330500 | 1.57332200  | -0.06005000 |
| Si | -0.92336700 | -1.57328200 | -0.06009000 |
| C  | -2.26559900 | 1.34478100  | -1.41074900 |
| C  | 0.39722600  | 2.94707400  | -0.16917000 |
| C  | -1.60980300 | 1.32762700  | 1.70877900  |
| C  | 0.39712300  | -2.94708000 | -0.16914800 |
| C  | -2.26561100 | -1.34468500 | -1.41082600 |
| C  | -1.61002400 | -1.32764300 | 1.70868400  |
| C  | -2.35542900 | 0.00004600  | 1.99369100  |
| C  | -3.04631700 | 0.00005000  | -1.35870200 |
| C  | 1.70892100  | 2.32087900  | 0.39474700  |
| C  | 1.70882400  | -2.32091300 | 0.39478500  |
| C  | 2.43910200  | 1.27472900  | -0.48862000 |
| C  | 2.43905200  | -1.27480900 | -0.48859700 |
| C  | 3.62695200  | -0.66733800 | 0.22154300  |
| C  | 3.62698000  | 0.66722500  | 0.22152900  |
| H  | 1.44181100  | -0.00003400 | -1.96609400 |
| H  | -2.99946900 | 2.16007100  | -1.40345300 |
| H  | -1.74776900 | 1.41962100  | -2.37842700 |
| H  | 0.16040700  | 3.86351400  | 0.38209900  |
| H  | 0.54837800  | 3.23867200  | -1.21734700 |
| H  | -2.26827400 | 2.16131000  | 1.98453700  |
| H  | -0.74432500 | 1.40105800  | 2.38385600  |
| H  | 0.16025700  | -3.86349400 | 0.38214300  |
| H  | 0.54829300  | -3.23871700 | -1.21731200 |
| H  | -2.99949100 | -2.15996800 | -1.40355700 |
| H  | -1.74778700 | -1.41948800 | -2.37850900 |
| H  | -2.26870200 | -2.16123200 | 1.98423600  |
| H  | -0.74465200 | -1.40134800 | 2.38386600  |
| H  | -2.63560300 | 0.00002900  | 3.05473800  |
| H  | -3.30392200 | 0.00014800  | 1.44947800  |
| H  | -3.74110400 | 0.00007900  | -2.20799400 |
| H  | -3.68368500 | 0.00002300  | -0.47057200 |
| H  | 2.42787500  | 3.12161200  | 0.61061200  |
| H  | 1.49497000  | 1.84513700  | 1.36516500  |
| H  | 2.42774800  | -3.12166200 | 0.61068900  |
| H  | 1.49486400  | -1.84513600 | 1.36518500  |
| H  | 2.78119800  | 1.80126800  | -1.39291800 |
| H  | 2.78113000  | -1.80137800 | -1.39288300 |
| H  | 4.39680200  | -1.28101200 | 0.68267400  |
| H  | 4.39685400  | 1.28087700  | 0.68264800  |

#### B-2:

|    |             |             |             |
|----|-------------|-------------|-------------|
| B  | -0.44722900 | 0.36454000  | 0.00000000  |
| C  | -0.85153400 | 1.85064900  | 0.00000000  |
| Si | -0.15563700 | -0.71754000 | 1.58853900  |
| Si | -0.15563700 | -0.71754000 | -1.58853900 |
| C  | -1.36987200 | -2.16993000 | 1.32516200  |
| C  | -0.20654300 | 0.60450500  | 2.95907800  |
| C  | 1.53773500  | -1.54670800 | 1.30290400  |
| C  | -0.20654300 | 0.60450500  | -2.95907800 |
| C  | -1.36987200 | -2.16993000 | -1.32516200 |
| C  | 1.53773500  | -1.54670800 | -1.30290400 |
| C  | 1.54465600  | -2.39021000 | 0.00000000  |
| C  | -1.02959200 | -2.92344200 | 0.00000000  |
| C  | 0.43068600  | 1.87514200  | 2.31811500  |
| C  | 0.43068600  | 1.87514200  | -2.31811500 |
| C  | -0.41801800 | 2.64849300  | 1.27454300  |
| C  | -0.41801800 | 2.64849300  | -1.27454300 |
| C  | 0.35089400  | 3.79886000  | -0.66713400 |
| C  | 0.35089400  | 3.79886000  | 0.66713400  |
| H  | -1.95445200 | 1.74856100  | 0.00000000  |
| H  | -1.31156800 | -2.89374800 | 2.14851000  |
| H  | -2.40937200 | -1.82044300 | 1.29139400  |
| H  | 0.33240200  | 0.34209700  | 3.87554000  |
| H  | -1.24408800 | 0.81708300  | 3.24880100  |
| H  | 1.76916100  | -2.20812200 | 2.14924000  |
| H  | 2.34209000  | -0.80109400 | 1.26479700  |
| H  | 0.33240200  | 0.34209700  | -3.87554000 |
| H  | -1.24408800 | 0.81708300  | -3.24880100 |
| H  | -1.31156800 | -2.89374800 | -2.14851000 |
| H  | -2.40937200 | -1.82044300 | -1.29139400 |
| H  | 1.76916100  | -2.20812200 | -2.14924000 |
| H  | 2.34209000  | -0.80109400 | -1.26479700 |
| H  | 2.48799000  | -2.95420000 | 0.00000000  |
| H  | -1.66781200 | -3.81790300 | 0.00000000  |
| H  | 0.69505900  | 2.58522000  | 3.11197000  |
| H  | 1.38306500  | 1.60027600  | 1.83693700  |
| H  | 0.69505900  | 2.58522000  | -3.11197000 |
| H  | 1.38306500  | 1.60027600  | -1.83693700 |
| H  | -1.30117000 | 3.03603200  | 1.80535900  |
| H  | -1.30117000 | 3.03603200  | -1.80535900 |
| H  | 0.85098300  | 4.54378800  | -1.28103200 |
| H  | 0.85098300  | 4.54378800  | 1.28103200  |
| C  | 0.42128700  | -3.44589300 | 0.00000000  |
| H  | 0.55382300  | -4.09060000 | 0.87944100  |
| H  | 0.55382300  | -4.09060000 | -0.87944100 |

**C-4:**

|    |             |             |             |
|----|-------------|-------------|-------------|
| B  | 0.08735600  | -0.02130000 | -0.17024700 |
| C  | -1.43257400 | 0.03504000  | -0.42367400 |
| Si | 1.19921300  | -1.58274900 | 0.09066600  |

|    |             |             |             |
|----|-------------|-------------|-------------|
| Si | 1.30172400  | 1.49475400  | -0.20807700 |
| C  | 2.50352900  | -1.55128000 | -1.30520300 |
| C  | -0.07456900 | -2.94278400 | -0.05386100 |
| C  | 1.95402300  | -1.19964300 | 1.81010700  |
| C  | 0.11219600  | 2.88097800  | -0.63098100 |
| C  | 2.51462300  | 1.07463100  | -1.62557900 |
| C  | 2.16406200  | 1.44369700  | 1.50078800  |
| C  | 2.81585600  | 0.08785400  | 1.88800900  |
| C  | 3.31338400  | -0.24239300 | -1.47840200 |
| C  | -1.37306400 | -2.61451100 | -0.21157000 |
| C  | -1.21075200 | 2.62564500  | -0.57665800 |
| C  | -2.20741400 | -1.31188300 | -0.15708700 |
| C  | -2.00742200 | 1.44012600  | 0.02316100  |
| C  | -2.84859500 | -1.37283900 | 1.24465900  |
| C  | -3.31700200 | -1.50992500 | -1.21165300 |
| H  | 3.20601700  | -2.38800800 | -1.20248300 |
| H  | 1.94203300  | -1.74766000 | -2.22981800 |
| H  | 0.14018500  | -4.01133100 | -0.08154800 |
| H  | 2.55565400  | -2.04024000 | 2.17745100  |
| H  | 1.10786100  | -1.11307500 | 2.50779300  |
| H  | 0.39201400  | 3.85367100  | -1.03589700 |
| H  | 3.22245900  | 1.89830600  | -1.78364900 |
| H  | 1.90553100  | 1.02716900  | -2.54002800 |
| H  | 2.92762200  | 2.22752000  | 1.57987900  |
| H  | 1.40028800  | 1.70010700  | 2.24774900  |
| H  | 3.17252800  | 0.18336800  | 2.92123900  |
| H  | 3.71796900  | -0.05775100 | 1.28770600  |
| H  | 3.93878600  | -0.35613600 | -2.37288400 |
| H  | 4.01801700  | -0.14054600 | -0.64838600 |
| H  | -2.06286400 | -3.45646600 | -0.33292500 |
| H  | -1.87960700 | 3.42323300  | -0.91277000 |
| H  | -3.65723200 | -0.64640700 | 1.35590300  |
| H  | -2.10208000 | -1.19779100 | 2.02546100  |
| H  | -3.27839000 | -2.36598200 | 1.41197700  |
| H  | -4.03065600 | -0.68575500 | -1.21116500 |
| H  | -3.87554400 | -2.43244900 | -1.02052300 |
| H  | -2.88311800 | -1.58279000 | -2.21464100 |
| C  | -1.90488400 | 1.63473900  | 1.55510700  |
| H  | -2.62944400 | 1.03057800  | 2.10265100  |
| H  | -0.89958300 | 1.38052200  | 1.91044800  |
| H  | -2.08703000 | 2.68349200  | 1.81039600  |
| C  | -3.47158500 | 1.66434300  | -0.38872800 |
| H  | -3.59582400 | 1.57803200  | -1.47343500 |
| H  | -4.14680700 | 0.95468700  | 0.09319500  |
| H  | -3.79372800 | 2.66840900  | -0.09203600 |
| H  | -1.35383200 | 0.10094700  | -1.53527200 |

**C-5:**

|   |             |            |            |
|---|-------------|------------|------------|
| B | -0.82993900 | 0.00188800 | 0.00027100 |
|---|-------------|------------|------------|

|    |             |             |             |
|----|-------------|-------------|-------------|
| Si | -1.33761800 | -1.66634100 | -0.77410800 |
| C  | -3.25314100 | 1.27285100  | -0.80583200 |
| C  | -3.73749300 | -0.05586500 | -1.43471200 |
| C  | -3.73401200 | 1.28458600  | 0.66345300  |
| C  | -3.25489100 | 0.07396200  | 1.50061600  |
| C  | -3.25888400 | -1.32403400 | -0.69088500 |
| C  | -3.73920400 | -1.20269100 | 0.77546400  |
| C  | -0.74002100 | -3.07685100 | 0.41022400  |
| C  | -0.73114000 | 1.18592400  | -2.87046300 |
| C  | -0.53736700 | -1.36969100 | 2.75128100  |
| C  | -0.72728400 | 1.89557500  | 2.46119500  |
| C  | -0.53986200 | -1.69593300 | -2.56239400 |
| C  | -0.52789800 | 3.06864400  | -0.18841500 |
| C  | -1.54097800 | -3.52001500 | 1.65863500  |
| C  | -1.53358000 | 0.32944900  | -3.87992600 |
| C  | -1.52065200 | -2.56343900 | 2.87690300  |
| C  | -1.52499000 | 3.20072600  | 2.22259300  |
| C  | -1.51924200 | -1.20398100 | -3.66081600 |
| C  | -1.50615200 | 3.77760500  | 0.78509000  |
| H  | -3.76624600 | 2.09347400  | -1.32974500 |
| H  | -3.49639400 | -0.10141400 | -2.49370600 |
| H  | -4.83847400 | -0.05209700 | -1.38031900 |
| H  | -4.83509000 | 1.23882100  | 0.63755900  |
| H  | -3.49122400 | 2.22391700  | 1.15381000  |
| H  | -3.76931000 | 0.11915700  | 2.47248600  |
| H  | -3.77599600 | -2.18640900 | -1.13819900 |
| H  | -3.49964900 | -2.09772800 | 1.34390600  |
| H  | -4.84011500 | -1.15398000 | 0.74767500  |
| H  | -0.63562700 | -3.98708900 | -0.18428100 |
| H  | -0.62236900 | 2.15553800  | -3.36123500 |
| H  | -0.27097500 | -1.06542700 | 3.76921500  |
| H  | -0.62043500 | 1.83555500  | 3.54647200  |
| H  | -0.27701300 | -2.73053600 | -2.80766600 |
| H  | -0.26122800 | 3.79712500  | -0.96163000 |
| H  | -1.07506600 | -4.45930400 | 1.97679600  |
| H  | -2.56621300 | -3.78245500 | 1.38130500  |
| H  | -2.55729100 | 0.70459700  | -3.97028300 |
| H  | -1.06532700 | 0.52197400  | -4.85163800 |
| H  | -1.21900200 | -3.14989400 | 3.75095700  |
| H  | -2.52655400 | -2.19460300 | 3.10252500  |
| H  | -1.05553300 | 3.94450700  | 2.87600900  |
| H  | -2.54971700 | 3.09475100  | 2.59079800  |
| H  | -2.52694700 | -1.58015800 | -3.45634700 |
| H  | -1.21731000 | -1.66863600 | -4.60518100 |
| H  | -2.51308100 | 3.79232700  | 0.35536800  |
| H  | -1.20044100 | 4.82663700  | 0.85539000  |
| Si | -1.33230900 | 0.16691600  | 1.83343300  |
| Si | -1.33046000 | 1.50835100  | -1.05791000 |
| C  | 0.74435000  | 2.64302700  | 0.54214300  |

|   |            |             |             |
|---|------------|-------------|-------------|
| C | 0.64480500 | 2.03661600  | 1.82736100  |
| C | 1.79250200 | 1.56433500  | 2.48790900  |
| C | 3.03680400 | 1.73884600  | 1.88545800  |
| C | 3.14399800 | 2.37129700  | 0.65954400  |
| C | 2.01768900 | 2.83472400  | -0.02599800 |
| H | 3.93044700 | 1.37862000  | 2.39029300  |
| H | 4.12513100 | 2.51618300  | 0.21528100  |
| C | 0.63943300 | 0.56217700  | -2.67892000 |
| C | 0.73494600 | -0.85434900 | -2.56191500 |
| C | 2.00674800 | -1.44607000 | -2.44679600 |
| C | 3.13567500 | -0.62410900 | -2.39015700 |
| C | 3.03248100 | 0.75409200  | -2.45471800 |
| C | 1.78974400 | 1.36683300  | -2.60260500 |
| H | 4.11560500 | -1.08427600 | -2.29546300 |
| H | 3.92806800 | 1.36871600  | -2.39666100 |
| C | 0.63324700 | -2.60367000 | 0.85122000  |
| C | 0.73428600 | -1.79425700 | 2.01910800  |
| C | 2.00853400 | -1.40251200 | 2.47051700  |
| C | 3.13440900 | -1.76816700 | 1.72751100  |
| C | 3.02585600 | -2.51270400 | 0.56637100  |
| C | 1.78055500 | -2.94316200 | 0.11294200  |
| H | 4.11621300 | -1.45914200 | 2.07616000  |
| H | 3.91915000 | -2.77242000 | 0.00265700  |
| C | 1.73861700 | 2.87921400  | -2.62952800 |
| C | 2.26101700 | 3.55623200  | -1.33586900 |
| C | 2.24560600 | -2.94192700 | -2.41752600 |
| H | 3.32710600 | -3.09145500 | -2.48973800 |
| C | 1.72336700 | -3.72216900 | -1.18338400 |
| H | 2.32901500 | -4.63094800 | -1.08604300 |
| C | 2.25320200 | -0.62982800 | 3.75063700  |
| C | 1.73681900 | 0.83126500  | 3.81078900  |
| H | 2.34714500 | 1.36749200  | 4.54707400  |
| H | 3.33513600 | -0.62174400 | 3.91364100  |
| H | 2.34752400 | 3.24658900  | -3.46404900 |
| H | 3.34311600 | 3.68983400  | -1.42754100 |
| H | 0.71141500 | -4.06418800 | -1.38964800 |
| H | 1.82138700 | -3.40782400 | -3.31598600 |
| H | 1.82894900 | -1.17335400 | 4.60435200  |
| H | 0.72622600 | 0.82781300  | 4.21367400  |
| H | 1.84017900 | 4.56871400  | -1.29090700 |
| H | 0.72854400 | 3.23302000  | -2.82491800 |

**B(SiPhMe<sub>2</sub>)<sub>3</sub>:**

|    |             |             |             |
|----|-------------|-------------|-------------|
| B  | 0.00323500  | 0.00009800  | 1.66960900  |
| Si | -0.90409200 | 1.80670800  | 1.53504400  |
| Si | 2.02099500  | -0.11710300 | 1.52946200  |
| Si | -1.10760800 | -1.68894800 | 1.53533500  |
| C  | -1.82219000 | -1.59341100 | -0.21506100 |
| C  | -0.98744800 | -1.77207500 | -1.33015500 |

|   |             |             |             |
|---|-------------|-------------|-------------|
| C | -3.16498600 | -1.25992700 | -0.44877300 |
| C | -1.46803800 | -1.59705600 | -2.62577900 |
| H | 0.05935900  | -2.03538100 | -1.19280000 |
| C | -3.65260200 | -1.08648000 | -1.74337000 |
| H | -3.84410300 | -1.12962300 | 0.39113500  |
| C | -2.80032900 | -1.24556700 | -2.83464600 |
| H | -0.79437000 | -1.72680500 | -3.46780600 |
| H | -4.69483100 | -0.82571300 | -1.89993500 |
| H | -3.17613600 | -1.10324400 | -3.84329900 |
| C | -0.46930300 | 2.37390500  | -0.21805400 |
| C | 0.49101400  | 3.36866900  | -0.45717900 |
| C | -1.04607000 | 1.73876200  | -1.32983500 |
| C | 0.88067300  | 3.70132700  | -1.75388300 |
| H | 0.94721100  | 3.89281100  | 0.37998400  |
| C | -0.65850800 | 2.06450800  | -2.62756800 |
| H | -1.79786800 | 0.96497900  | -1.18828300 |
| C | 0.31228100  | 3.04116000  | -2.84182600 |
| H | 1.62788100  | 4.47242000  | -1.91464500 |
| H | -1.11126700 | 1.54464500  | -3.46688000 |
| H | 0.62016900  | 3.29314200  | -3.85208600 |
| C | 2.28994700  | -0.78069100 | -0.22310600 |
| C | 2.67276700  | -2.10968400 | -0.46026900 |
| C | 2.02322200  | 0.03327500  | -1.33596600 |
| C | 2.76305900  | -2.61632300 | -1.75606100 |
| H | 2.90273600  | -2.76413700 | 0.37783400  |
| C | 2.10853500  | -0.46812100 | -2.63273700 |
| H | 1.72802600  | 1.07116700  | -1.19580500 |
| C | 2.47079300  | -1.79697000 | -2.84501900 |
| H | 3.05893400  | -3.64870300 | -1.91542800 |
| H | 1.88121200  | 0.18139000  | -3.47304900 |
| H | 2.53302200  | -2.19166700 | -3.85459000 |
| C | -2.78521700 | 1.82215100  | 1.70658700  |
| H | -3.25605800 | 1.13386900  | 0.99808100  |
| H | -3.09686800 | 1.54295400  | 2.71819100  |
| H | -3.16307900 | 2.82915700  | 1.50064300  |
| C | -0.20943000 | 3.05460000  | 2.77407900  |
| H | 0.87520800  | 3.16072900  | 2.68900900  |
| H | -0.66611000 | 4.03666400  | 2.60925300  |
| H | -0.43777200 | 2.74855600  | 3.79990100  |
| C | -2.53144400 | -1.71435300 | 2.77939800  |
| H | -3.15316900 | -2.60141300 | 2.61583000  |
| H | -2.14858600 | -1.75974100 | 3.80385300  |
| H | -3.16709300 | -0.82883300 | 2.69753800  |
| C | -0.17905500 | -3.32555200 | 1.70137300  |
| H | 0.64974000  | -3.38841100 | 0.98961800  |
| H | 0.22243900  | -3.45671500 | 2.71132700  |
| H | -0.86287000 | -4.15621600 | 1.49728200  |
| C | 2.75884000  | -1.33968700 | 2.76905300  |
| H | 2.30860800  | -2.33253000 | 2.68795800  |



|   |            |             |            |
|---|------------|-------------|------------|
| H | 3.83717800 | -1.43523200 | 2.60104800 |
| H | 2.61117200 | -0.98645300 | 3.79450200 |
| C | 2.97421900 | 1.50534000  | 1.69500000 |
| H | 4.03480600 | 1.32943200  | 1.48649100 |
| H | 2.61103900 | 2.25563100  | 0.98606000 |
| H | 2.89075100 | 1.91679400  | 2.70602300 |

**B(SiPhMe<sub>2</sub>)<sub>2</sub>SiMe<sub>3</sub>:**

|    |             |             |             |
|----|-------------|-------------|-------------|
| B  | 0.16315600  | 1.05518100  | 0.42767000  |
| Si | 2.17629600  | 1.18512500  | 0.40647800  |
| Si | -0.67242800 | -0.39950200 | 1.55877600  |
| Si | -0.99846300 | 2.18553000  | -0.78418400 |
| C  | 2.62358400  | -0.49849700 | -0.33128200 |
| C  | 3.49174100  | -1.39488300 | 0.30576200  |
| C  | 1.98667100  | -0.92888100 | -1.50703900 |
| C  | 3.71509900  | -2.67138500 | -0.20622600 |
| H  | 3.99313000  | -1.09970100 | 1.22498500  |
| C  | 2.20013700  | -2.20609100 | -2.02217700 |
| H  | 1.31050600  | -0.25502800 | -2.03345400 |
| C  | 3.06431300  | -3.08129700 | -1.36771100 |
| H  | 4.39191300  | -3.34950300 | 0.30443200  |
| H  | 1.69385500  | -2.51734900 | -2.93100300 |
| H  | 3.23140800  | -4.07833800 | -1.76263200 |
| C  | -2.13923200 | -1.09560900 | 0.59424500  |
| C  | -3.45460300 | -1.05107300 | 1.07191900  |
| C  | -1.92923700 | -1.59641000 | -0.70073500 |
| C  | -4.52426100 | -1.47519300 | 0.28444300  |
| H  | -3.65474000 | -0.66299400 | 2.06834900  |
| C  | -2.99211100 | -2.01814000 | -1.49559900 |
| H  | -0.91505400 | -1.65353300 | -1.09858500 |
| C  | -4.29496900 | -1.95202500 | -1.00352400 |
| H  | -5.53689900 | -1.42663300 | 0.67302400  |
| H  | -2.80720700 | -2.39620400 | -2.49660700 |
| H  | -5.12707500 | -2.27478700 | -1.62124700 |
| C  | 2.93457100  | 2.55390600  | -0.65216800 |
| H  | 2.52901000  | 2.54433200  | -1.66905900 |
| H  | 2.73971400  | 3.54019700  | -0.21885900 |
| H  | 4.01910200  | 2.42043300  | -0.72106200 |
| C  | 2.91000500  | 1.31976300  | 2.14427800  |
| H  | 2.56591600  | 0.51133500  | 2.79620600  |
| H  | 4.00420400  | 1.28733900  | 2.10412400  |
| H  | 2.62472800  | 2.26986000  | 2.60679300  |
| C  | -0.51050400 | 4.01103000  | -0.63751100 |
| H  | -1.16102000 | 4.62191100  | -1.27310600 |
| H  | -0.60899800 | 4.37918800  | 0.38880800  |
| H  | 0.52319000  | 4.17037200  | -0.95763600 |
| C  | -2.86151300 | 2.06109800  | -0.49170400 |
| H  | -3.24848800 | 1.08948500  | -0.81471000 |
| H  | -3.12444000 | 2.18860800  | 0.56378000  |

|   |             |             |             |
|---|-------------|-------------|-------------|
| H | -3.37488400 | 2.84381300  | -1.06186400 |
| C | -1.30401600 | 0.40632900  | 3.15241800  |
| H | -2.00275900 | 1.22305500  | 2.94633500  |
| H | -1.81764900 | -0.33501300 | 3.77400900  |
| H | -0.47100900 | 0.81061000  | 3.73614000  |
| C | 0.45881300  | -1.84552700 | 2.00040600  |
| H | -0.08113500 | -2.55417800 | 2.63738500  |
| H | 0.78612800  | -2.37438400 | 1.09899600  |
| H | 1.35677500  | -1.51599100 | 2.53265500  |
| C | -0.68054100 | 1.64474400  | -2.57547900 |
| H | 0.36492900  | 1.77849500  | -2.87078600 |
| H | -0.95891700 | 0.59688700  | -2.72917600 |
| H | -1.29935800 | 2.25451600  | -3.24346000 |

**Ring6-1:**

|    |             |             |             |
|----|-------------|-------------|-------------|
| C  | 3.10030100  | 3.77810300  | -1.13889500 |
| C  | 3.99010300  | 3.15776100  | -0.26669700 |
| C  | 3.50069200  | 2.32143600  | 0.73172500  |
| C  | 2.13236300  | 2.07129900  | 0.87680800  |
| C  | 1.23331600  | 2.71181400  | 0.00433900  |
| C  | 1.73554500  | 3.55557500  | -0.99119600 |
| H  | 1.03433900  | 4.04409300  | -1.66362400 |
| C  | -0.25434000 | 2.46445200  | 0.07857400  |
| H  | -0.77955900 | 3.28515300  | -0.42411100 |
| H  | -0.59699700 | 2.47659600  | 1.11677600  |
| C  | 1.66864800  | 1.16899100  | 2.00532200  |
| H  | 1.85824400  | 1.68399800  | 2.95561500  |
| H  | 0.58588300  | 1.01923400  | 1.95845000  |
| C  | 2.36893400  | -0.21677600 | 2.06514200  |
| H  | 3.45488100  | -0.05791800 | 2.08264100  |
| H  | 2.10281400  | -0.66043700 | 3.03431100  |
| C  | -0.65857000 | 1.13974300  | -0.58757800 |
| H  | -0.04218700 | 0.31156200  | -0.17384700 |
| H  | -0.34873400 | 1.15225700  | -1.64372600 |
| B  | 1.93663500  | -1.15829100 | 0.85794600  |
| B  | -2.12592100 | 0.59242400  | -0.42872600 |
| H  | 3.46451800  | 4.43493400  | -1.92201300 |
| H  | 5.05815700  | 3.32853400  | -0.35617200 |
| Si | -3.51313400 | 1.35758400  | 0.84106500  |
| Si | -2.66449500 | -0.90768600 | -1.68756100 |
| Si | 3.02766200  | -1.21317100 | -0.86140000 |
| Si | 0.46159800  | -2.47063100 | 1.34962800  |
| C  | -4.86578800 | 0.08894000  | 1.21335600  |
| H  | -5.61140200 | 0.51824300  | 1.89136100  |
| H  | -5.38251100 | -0.22148000 | 0.29917200  |
| H  | -4.45461900 | -0.80850400 | 1.68835900  |
| C  | -3.34680600 | -2.43918800 | -0.80323100 |
| H  | -4.37881500 | -2.26546700 | -0.48509000 |
| H  | -3.34146100 | -3.29528000 | -1.48707500 |

|   |             |             |             |
|---|-------------|-------------|-------------|
| H | -2.76414800 | -2.71385200 | 0.08013400  |
| C | -0.13250500 | -3.69747500 | 0.04051600  |
| H | 0.69713900  | -4.33853800 | -0.27374100 |
| H | -0.90942700 | -4.34159200 | 0.46848500  |
| H | -0.54797700 | -3.22345100 | -0.85235700 |
| C | 2.53632200  | 0.06448000  | -2.16419200 |
| H | 1.50951000  | -0.08065200 | -2.51252800 |
| H | 2.63728800  | 1.08785000  | -1.79276200 |
| H | 3.20186900  | -0.05628600 | -3.02709500 |
| C | 2.87807100  | -2.91696200 | -1.67789300 |
| H | 1.86373900  | -3.08486700 | -2.05501000 |
| H | 3.56800500  | -2.98751700 | -2.52614300 |
| H | 3.11754900  | -3.72986300 | -0.98364600 |
| C | 4.85626900  | -0.94233300 | -0.44443700 |
| H | 5.20956000  | -1.64165800 | 0.32071500  |
| H | 5.47090400  | -1.08604400 | -1.33988100 |
| H | 5.02444600  | 0.07630600  | -0.08180000 |
| C | 1.22238900  | -3.53198500 | 2.73058800  |
| H | 1.49274100  | -2.93413800 | 3.60604000  |
| H | 0.49969200  | -4.29117600 | 3.04972300  |
| H | 2.12093900  | -4.05446200 | 2.38569200  |
| C | -1.03604000 | -1.58364100 | 2.11264400  |
| H | -1.59333100 | -0.99240600 | 1.37583600  |
| H | -1.73453000 | -2.31410800 | 2.53714900  |
| H | -0.72289500 | -0.91007200 | 2.91818100  |
| C | -2.86526000 | 1.98712000  | 2.50809700  |
| H | -2.35211200 | 2.94800000  | 2.40811200  |
| H | -3.70711000 | 2.12870200  | 3.19494200  |
| H | -2.17392200 | 1.27649300  | 2.97317300  |
| C | -4.31852900 | 2.81575000  | -0.06804200 |
| H | -4.75214900 | 2.50231100  | -1.02310800 |
| H | -5.12338300 | 3.23760500  | 0.54397200  |
| H | -3.59489100 | 3.61227600  | -0.26767800 |
| C | -4.04193400 | -0.25368100 | -2.81609100 |
| H | -4.32607700 | -1.02052200 | -3.54508300 |
| H | -4.93430800 | 0.00784600  | -2.23792800 |
| H | -3.72522200 | 0.63516700  | -3.37116700 |
| C | -1.20288100 | -1.39794100 | -2.79349200 |
| H | -1.40791900 | -2.32441800 | -3.34097000 |
| H | -1.00222500 | -0.61165100 | -3.53013900 |
| H | -0.28240300 | -1.54606000 | -2.21713800 |
| H | 4.19990300  | 1.85636700  | 1.42244400  |

**Ring6-2:**

|   |             |            |             |
|---|-------------|------------|-------------|
| C | -2.39935200 | 3.42361700 | 1.09070700  |
| C | -2.85151300 | 2.77439900 | -0.05215300 |
| C | -1.94941600 | 2.14648700 | -0.91875700 |
| C | -0.58780800 | 2.20611400 | -0.61582000 |
| C | -0.11426300 | 2.85933500 | 0.52749800  |

|    |             |             |             |
|----|-------------|-------------|-------------|
| C  | -1.03702800 | 3.46214400  | 1.38236600  |
| H  | 0.13101700  | 1.74351200  | -1.28783400 |
| H  | -0.68572200 | 3.97286800  | 2.27507200  |
| C  | 1.35864100  | 2.87216000  | 0.85856200  |
| H  | 1.53951000  | 3.67239700  | 1.58472500  |
| H  | 1.94114400  | 3.11911700  | -0.03627000 |
| C  | -2.45422000 | 1.43729500  | -2.15950500 |
| H  | -2.87084200 | 2.17577400  | -2.85514400 |
| H  | -1.60592300 | 0.96927000  | -2.67329700 |
| C  | -3.53843800 | 0.36752900  | -1.85239300 |
| H  | -4.43653300 | 0.87187500  | -1.47501700 |
| H  | -3.81021500 | -0.10567900 | -2.80672300 |
| C  | 1.83526700  | 1.52639700  | 1.43505300  |
| H  | 1.14718200  | 1.19078100  | 2.22306300  |
| H  | 2.79154800  | 1.70225300  | 1.98170100  |
| B  | -2.93172700 | -0.69387100 | -0.84574600 |
| B  | 2.39967800  | 0.36042300  | 0.54496100  |
| H  | -3.10939400 | 3.90708000  | 1.75508500  |
| H  | -3.91465100 | 2.75666800  | -0.27836800 |
| Si | 3.36971000  | 0.68924300  | -1.20843900 |
| Si | 2.82925500  | -1.34641900 | 1.57101500  |
| Si | -3.38023200 | -0.78570500 | 1.12952000  |
| Si | -1.47192800 | -1.92260000 | -1.55536100 |
| C  | 3.94046000  | -0.90822300 | -2.04762800 |
| H  | 4.61503400  | -0.67105900 | -2.87791000 |
| H  | 4.47889400  | -1.56330900 | -1.35557200 |
| H  | 3.09537700  | -1.47157500 | -2.45644200 |
| C  | 2.35340900  | -2.97469900 | 0.73407500  |
| H  | 2.76667400  | -3.05503800 | -0.27625100 |
| H  | 2.74304200  | -3.80982900 | 1.32683100  |
| H  | 1.26664300  | -3.08853300 | 0.66806300  |
| C  | -1.40615500 | -3.60537800 | -0.69420800 |
| H  | -2.35057300 | -4.15157200 | -0.78228300 |
| H  | -0.61584600 | -4.21891500 | -1.14113200 |
| H  | -1.18073800 | -3.49465400 | 0.37173600  |
| C  | -1.76483400 | -0.39860400 | 2.04393200  |
| H  | -0.99463700 | -1.13626800 | 1.78571100  |
| H  | -1.39074500 | 0.59550000  | 1.77014400  |
| H  | -1.90832900 | -0.42459700 | 3.12985200  |
| C  | -3.95635400 | -2.52469600 | 1.62222700  |
| H  | -3.19941300 | -3.28832000 | 1.42916200  |
| H  | -4.18267700 | -2.53639600 | 2.69426600  |
| H  | -4.86933300 | -2.81045300 | 1.08950100  |
| C  | -4.74186700 | 0.38788200  | 1.72056200  |
| H  | -5.64908100 | 0.28260600  | 1.11584700  |
| H  | -5.00481300 | 0.15195500  | 2.75779300  |
| H  | -4.42306500 | 1.43165700  | 1.68269900  |
| C  | -1.63813000 | -2.21884800 | -3.41821500 |
| H  | -1.64423500 | -1.27349900 | -3.97160600 |

|   |             |             |             |
|---|-------------|-------------|-------------|
| H | -0.80059900 | -2.81945600 | -3.78919700 |
| H | -2.56392700 | -2.75219800 | -3.65744000 |
| C | 0.21302700  | -1.09464400 | -1.25572000 |
| H | 0.26074800  | -0.66218700 | -0.24664700 |
| H | 1.01301600  | -1.83487100 | -1.35623200 |
| H | 0.39389800  | -0.29745500 | -1.98189900 |
| C | 2.54843400  | 1.72790000  | -2.56815600 |
| H | 2.21770800  | 2.71094700  | -2.22142000 |
| H | 3.28723000  | 1.88704900  | -3.36250100 |
| H | 1.69070600  | 1.22115200  | -3.02194300 |
| C | 4.92371400  | 1.64130800  | -0.66663800 |
| H | 5.49332700  | 1.08953900  | 0.08826600  |
| H | 5.58162100  | 1.81075200  | -1.52619800 |
| H | 4.66148600  | 2.61774000  | -0.24529500 |
| C | 4.71190800  | -1.35614400 | 1.82603700  |
| H | 4.99999300  | -2.21790700 | 2.43829400  |
| H | 5.25527100  | -1.42003100 | 0.87805500  |
| H | 5.04781000  | -0.45194500 | 2.34557900  |
| C | 2.04459400  | -1.33846400 | 3.29403600  |
| H | 2.32042900  | -2.24559300 | 3.84292100  |
| H | 2.38480700  | -0.47769800 | 3.87986800  |
| H | 0.95171100  | -1.29469200 | 3.24285400  |
